# Supplementary material for: Selective copper-catalysed atom transfer radical addition (ATRA) in water under environmentally benign conditions
Source: Royal Society of Chemistry journal article supplement (doi:10.1039/d3dt02044d), 2023-01-01
Supplement: d3dt02044d1.pdf [file d3dt02044d1.pdf]

## Supplementary Information

### **Selective Copper-Catalysed Atom Transfer Radical Addition (ATRA) in Water under Environmentally-Benign Condition**

Nutchanikan Phiromphu,<sup>a</sup> Methasit Juthathan,<sup>a</sup> Pattira Suktanarak,<sup>b</sup> Mongkol Sukwattanasinitt,<sup>a</sup> Thawatchai Tuntulani,<sup>a</sup> and Pannee Leeladee<sup>\*a</sup>

- 
- [a] Dr. Nutchanikan Phiromphu, Methasit Juthathan, Prof. Dr. Mongkol Sukwattanasinitt, Prof. Dr. Thawatchai Tuntulani, Assist. Prof. Dr. Pannee Leeladee  
Department of Chemistry, Faculty of Science, Chulalongkorn University  
Bangkok, Thailand.  
E-mail: pannee.l@chula.ac.th
- [b] Dr. Pattira Suktanarak  
Faculty of Sport and Health Sciences, Thailand National Sports University Lampang Campus  
Lampang, Thailand

## Table of Contents

|                                                                               |    |
|-------------------------------------------------------------------------------|----|
| Synthesis and characterization.....                                           | 3  |
| Product analysis of catalytic ATRA reaction in aqueous dispersed system.....  | 6  |
| Comparison of catalytic performance of various copper catalysts for ATRA..... | 14 |
| Determination of droplet/particle size.....                                   | 16 |

## Synthesis and characterization

**I) Synthesis of 2,2'-dipicolylamine (DPA).** The suspension of anhydrous  $\text{MgSO}_4$  (2.78 g, 23.1 mmol) in  $\text{CH}_2\text{Cl}_2$  (3.80 mL) was added 2-pyridinecarboxaldehyde (0.50 g, 4.60 mmol) and 2-(aminomethyl)pyridine (0.50 g, 4.60 mmol). The mixture was stirred for 3 h at room temperature under  $\text{N}_2$ . After that, the suspension was filtered, and solvent in the filtrate was removed under vacuum to obtain a yellow oil product. The product was redissolved in  $\text{CH}_3\text{CN}$  (12 mL) and cooled to  $-5^\circ\text{C}$  for 15 min.  $\text{NaBH}_4$  was slowly added in the solution and stirred for 18 h at room temperature. The reaction was quenched with conc.  $\text{HCl}$  (7.70 mL) and heated at  $60^\circ\text{C}$  for 2 h to give the white precipitates in the yellow solution. The white solid was filtered out, and solvent in the filtrate was removed under vacuum. The crude product was redissolved in  $\text{H}_2\text{O}$ . To the aqueous solution was added  $\text{NaOH}$  pellets (3.30 g, 82.5 mmol) and the mixture was stirred for 15 min. After that, the solution was extracted with diethyl ether (3 x 200 mL) and dried under vacuum to obtain the yellow oil product (0.73 g, 80%).  $^1\text{H NMR}$  (400 MHz,  $\text{CDCl}_3$ , ppm):  $\delta$  8.49 (m, 2H, ArH), 7.50 (m, 2H, ArH), 7.23 (d, 2H,  $J = 8.0$  Hz, ArH), 7.01 (m, 2H, ArH), 3.84 (s, 4H,  $-\text{CH}_2-$ ).

**II) Synthesis of 9-[(2,2'-dipicolylamino)methyl]anthracene (ADPA).** The solution of 9-(chloromethyl)anthracene (1.00 g, 4.40 mmol), 2,2'-dipicolylamine (1.05 g, 5.20 mmol) and  $\text{K}_2\text{CO}_3$  (2.43 g, 1.70 mmol) in anhydrous DMF (6.8 mL) was slowly added a solution of  $\text{KI}$  (0.73 g, 4.40 mmol) in DMF (3.6 mL). The reaction mixture was stirred at room temperature over 1 h, after which the solution was added 1 M  $\text{HCl}$  and washed with  $\text{EtOAc}$ . The aqueous solution was then alkalinized with 4 M  $\text{NaOH}$  and extracted with  $\text{EtOAc}:\text{THF}$  (1:1). The combined organic layers were washed with  $\text{H}_2\text{O}$  and brine solution, followed by drying over  $\text{MgSO}_4$ , and the solvent was removed under reduced pressure. Recrystallization in  $\text{MeOH}:\text{Et}_2\text{O}$  afforded the title product as a pale yellow solid (0.57 g, 24%).  $^1\text{H NMR}$  (400 MHz,  $\text{CDCl}_3$ , ppm):  $\delta$  8.49 (d, 2H,  $J = 4.0$  Hz, ArH), 8.39 (s, 1H, ArH), 8.37 (d, 2H,  $J = 4.8$  Hz, ArH), 7.95 (m, 2H, ArH), 7.57 (ddd, 2H,  $J = 1.6, 7.6, 7.6$  Hz, ArH), 7.41-7.47 (m, 4H, ArH), 7.31 (d, 2H,  $J = 7.6$  Hz, ArH), 7.11 (dd, 2H,  $J = 4.8, 6.0$  Hz, ArH), 4.67 (s, 2H,  $-\text{CH}_2-$ ), 3.88 (s, 4H,  $-\text{CH}_2-$ ).

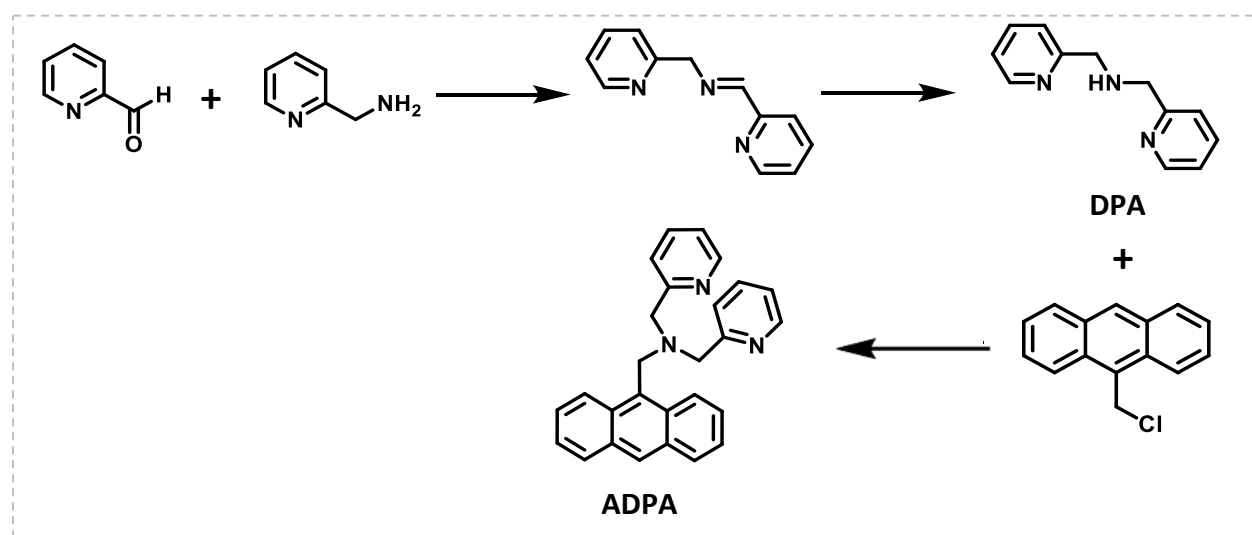

**Scheme S1** Synthesis of DPA and ADPA ligands.

(a)

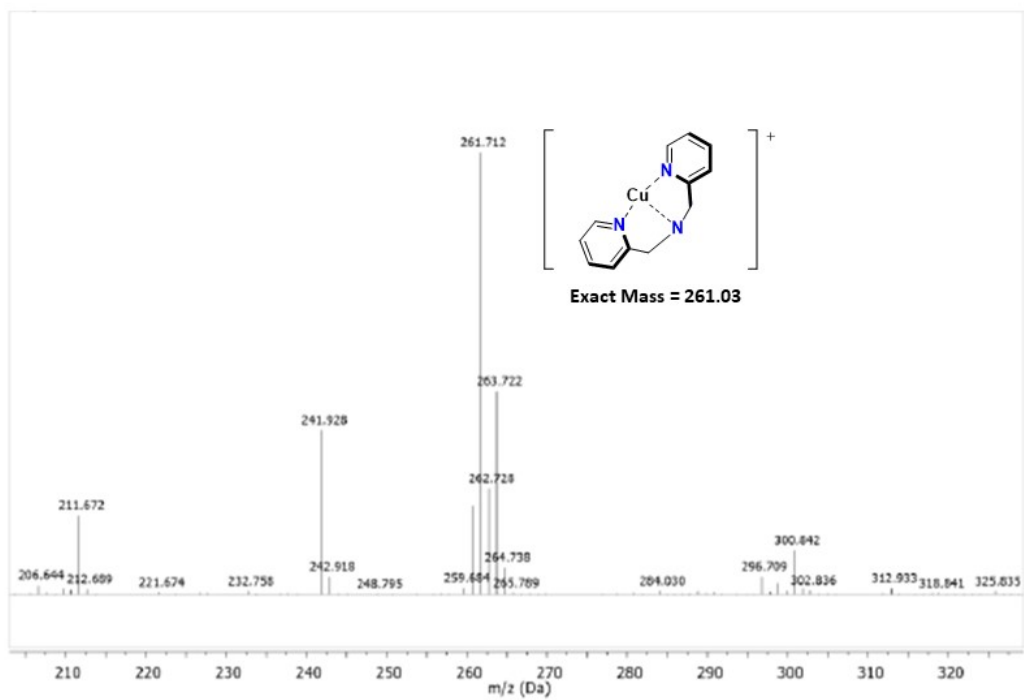

(b)

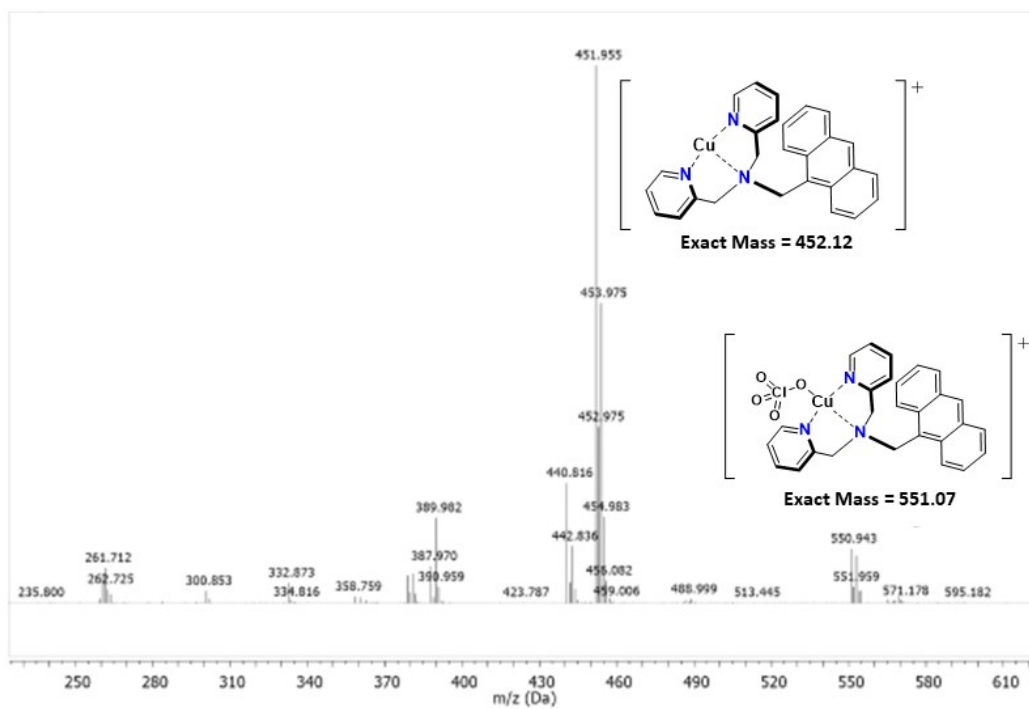

(c)

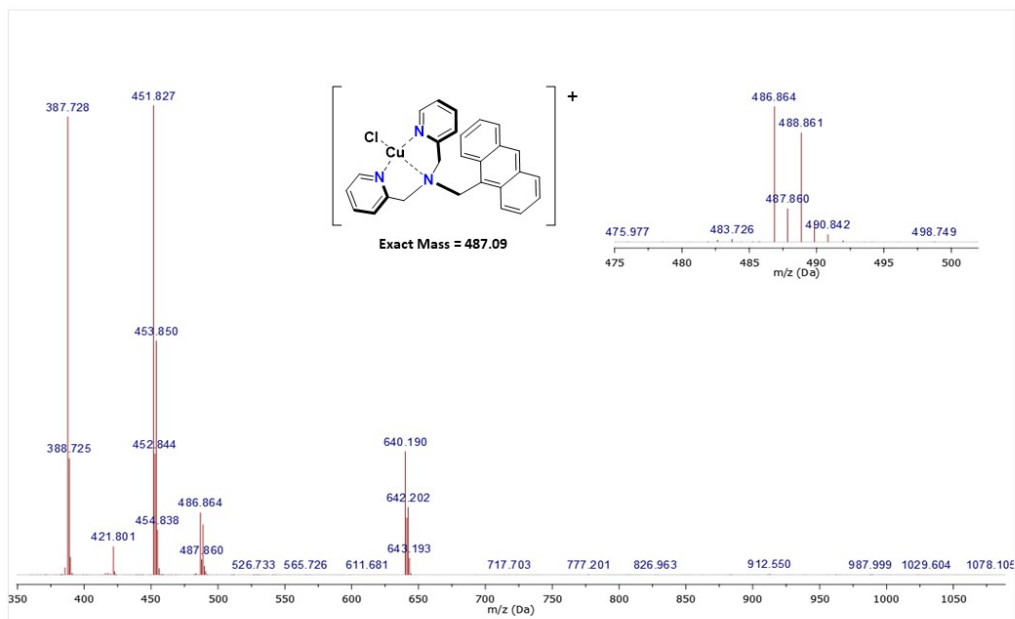

**Figure S1** MALDI-TOF mass spectra of (a) Cu(DPA) complex, (b) Cu(ADPA) complex, and (c) reaction solution of Cu(ADPA) + AsH<sub>2</sub> + CCl<sub>4</sub> in CH<sub>3</sub>CN.

## Product analysis of catalytic ATRA reaction in aqueous dispersed system

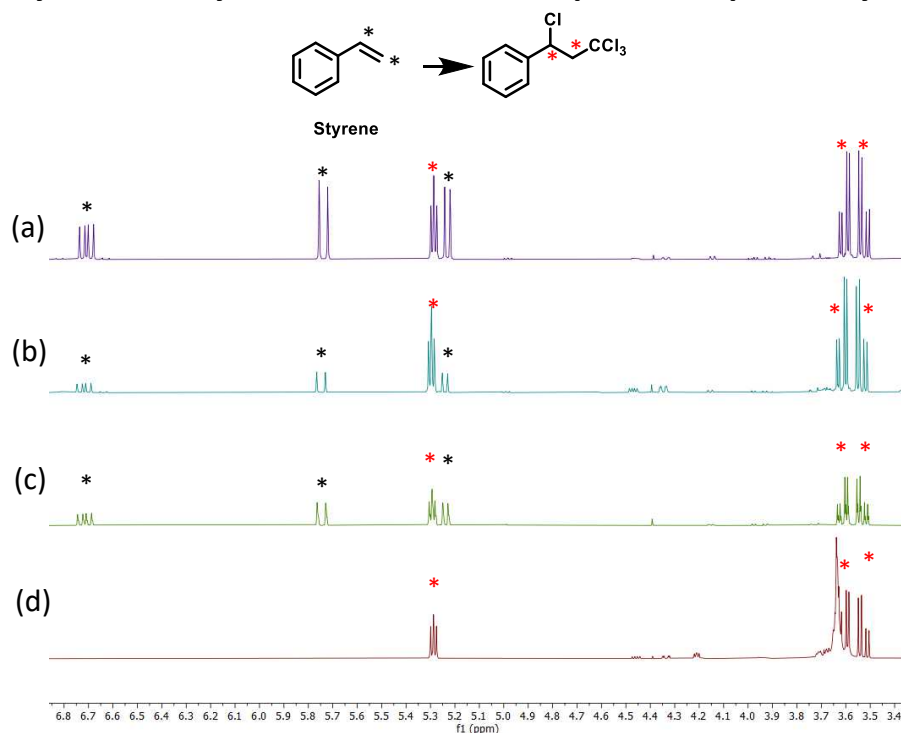

**Figure S3**  $^1\text{H}$  NMR spectra for product determination from **1b**-catalysed ATRA of  $\text{CCl}_4$  to styrene in 2 wt% Tween 20/ $\text{H}_2\text{O}$  monitored at the reaction time of (a) 3 h, (b) 4 h, (c) 5 h, and (d) 6 h.

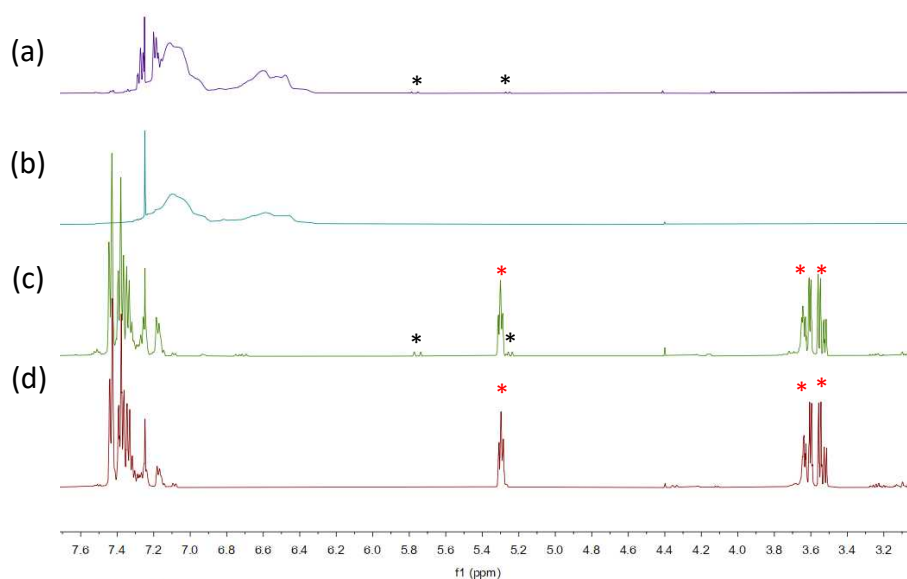

**Figure S4**  $^1\text{H}$  NMR spectra for product determination from copper-catalysed ATRA of  $\text{CCl}_4$  to styrene in 2 wt% Tween 20/ $\text{H}_2\text{O}$  using 1% mol of  $\text{Cu}(\text{II})$  catalyst; (a)  $\text{Cu}(\text{ClO}_4)_2$ , (b) **1a**, (c) **1b**, and (d) **2b**.

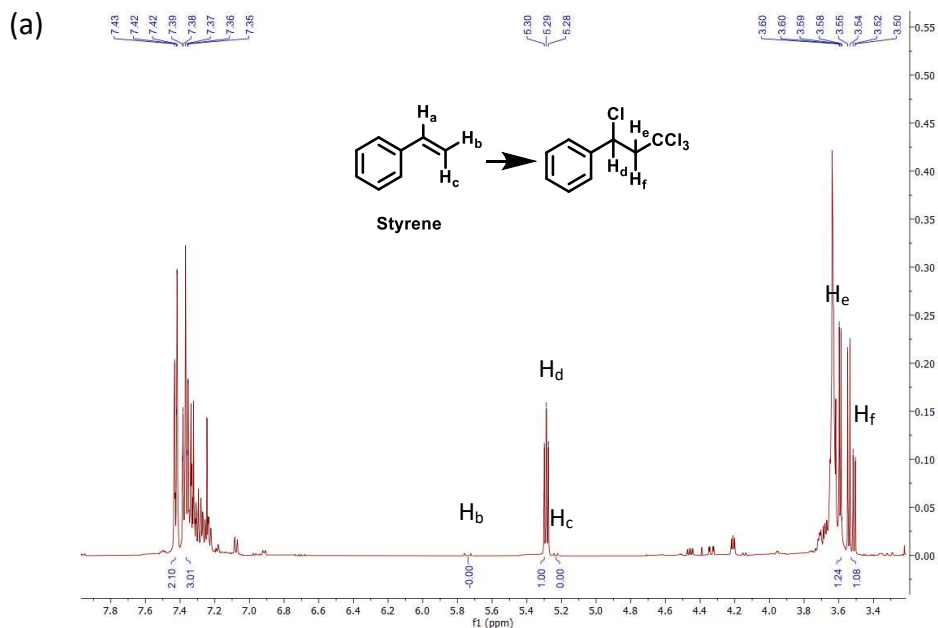

**\*Calculation :** Conversion (%) of alkene was calculated according to the following equations.

$$\% \text{ conversion} = \frac{I_p}{I_{\text{alkene}} + I_p} \times 100$$

When  $I_p$  = The integration of proton signal of the analysed product (e.g., H<sub>d</sub>, H<sub>e</sub>, or H<sub>f</sub>)

$I_{\text{alkene}}$  = The integration of proton signal of the alkene (e.g., H<sub>a</sub>, H<sub>b</sub>, or H<sub>c</sub>)

The integrated peak area of one proton in the product was initially set to be equal 1.00.

For Example: Considering the spectrum (a)

$$\begin{aligned} \% \text{ conversion} &= \frac{\int H_d}{\int H_a + \int H_d} \times 100 \\ &= \frac{1.00}{0.00 + 1.00} \times 100 \\ &= 100 \% \end{aligned}$$

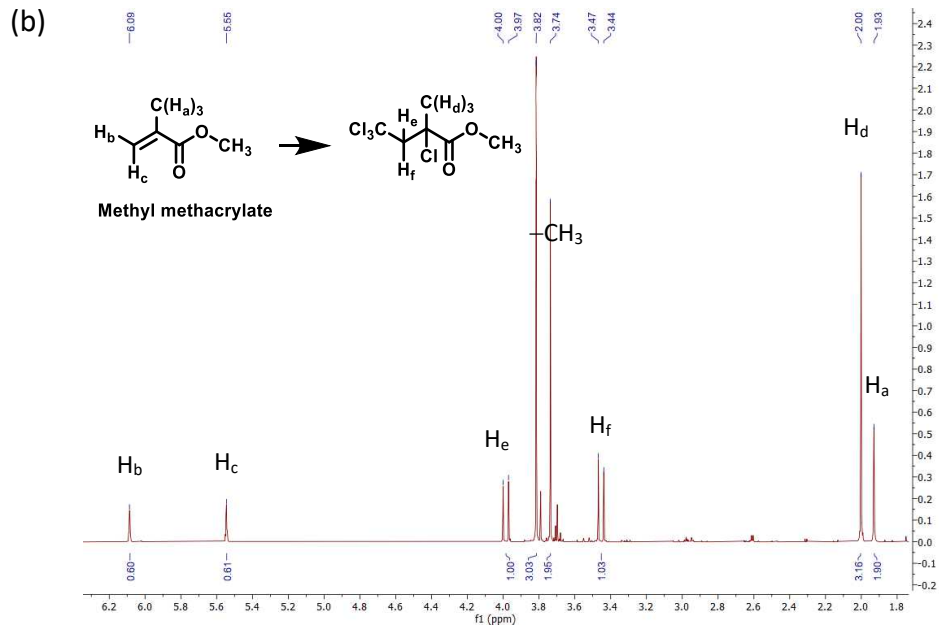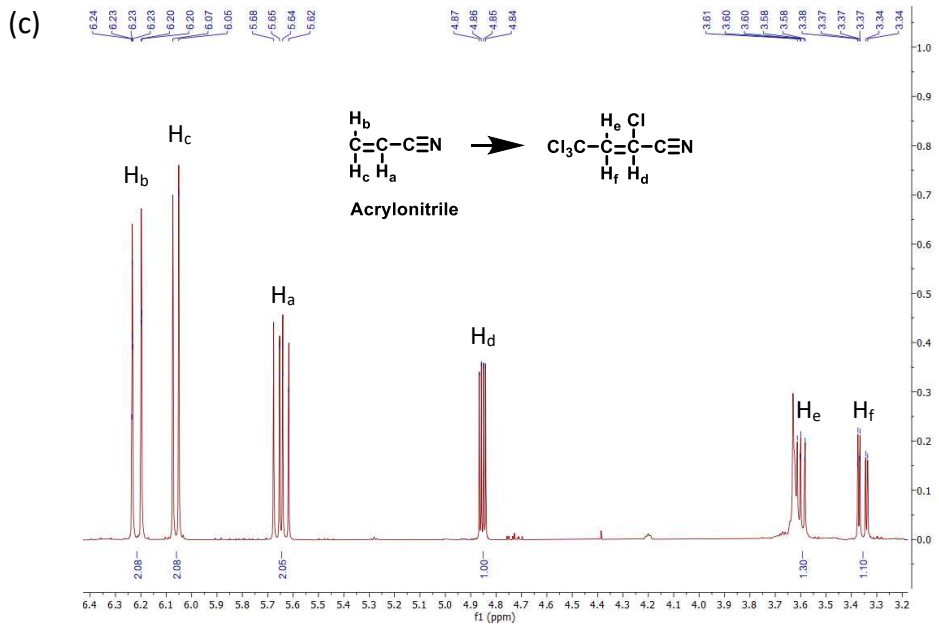



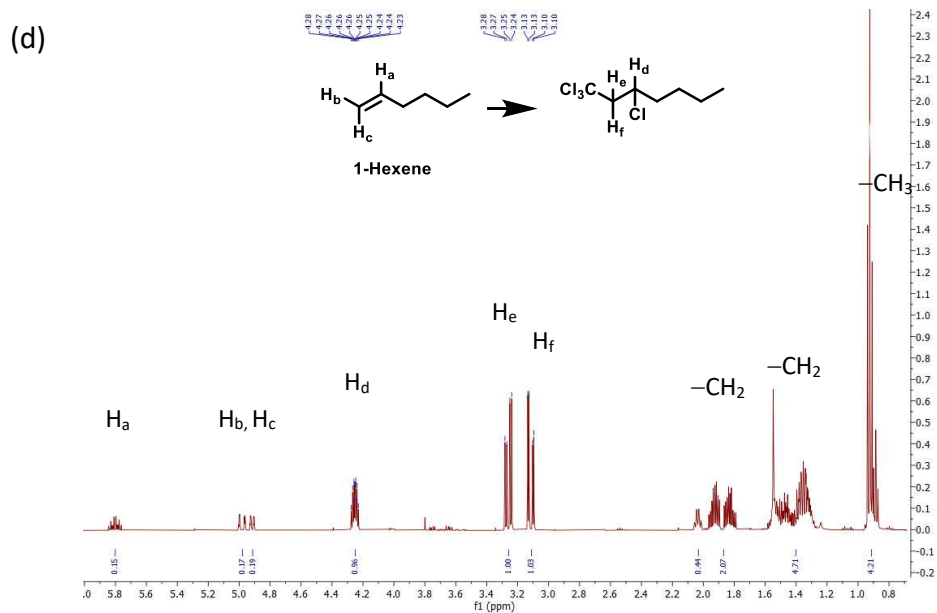

**Figure S4** <sup>1</sup>H NMR spectra for product determination of **1b**-catalysed ATRA reaction in 2 wt% Tween 20 with various alkene substrates; (a) styrene, (b) methyl methacrylate, (c) acrylonitrile, and (d) 1-hexene.

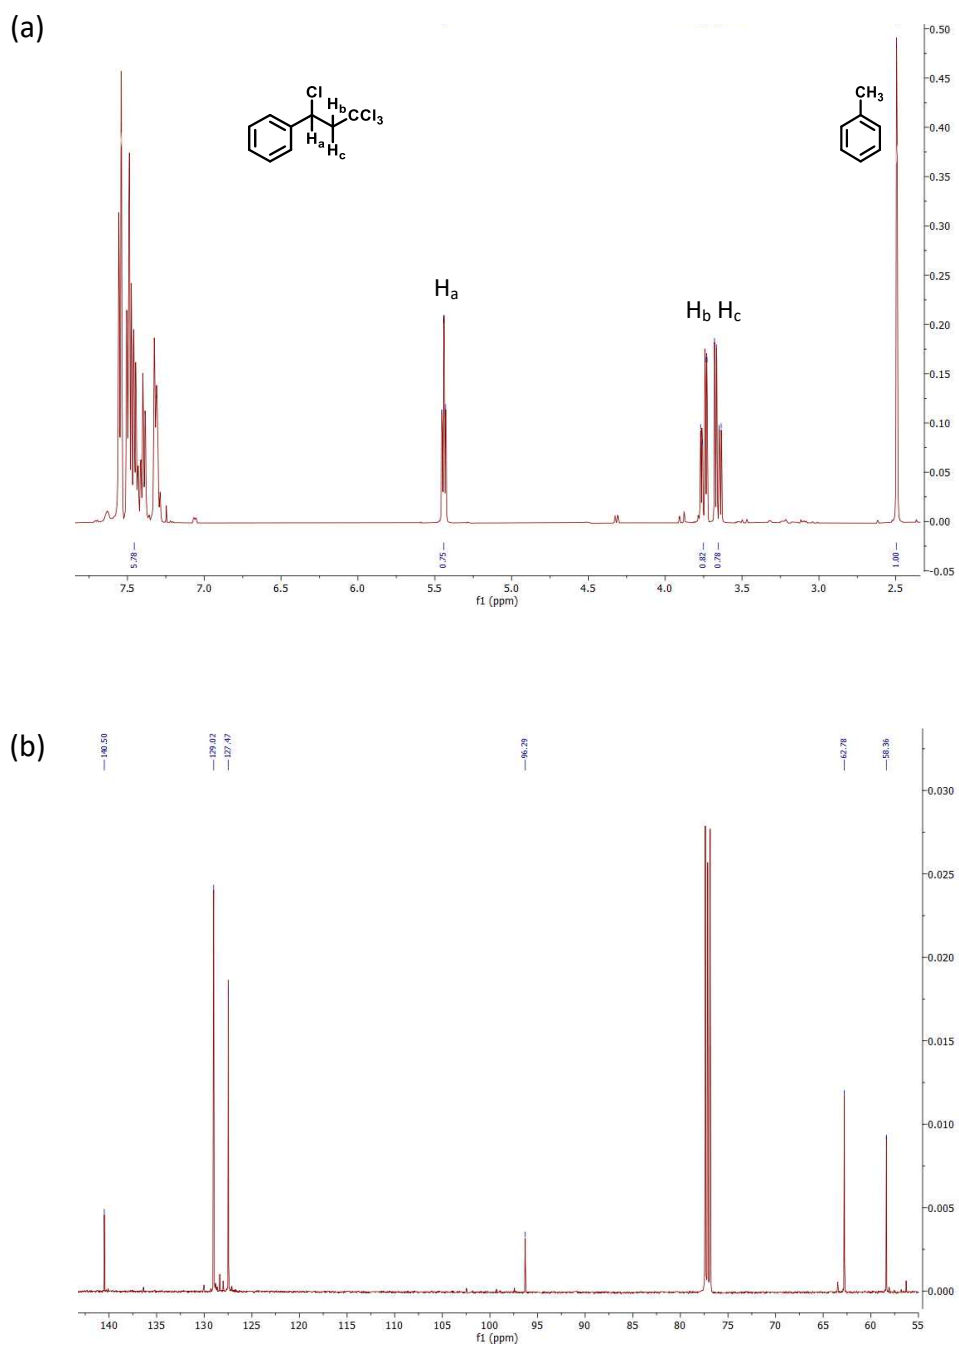

**\*Calculation:** Yield (%) of product was calculated according to the following equations.<sup>S1, S2</sup>

$$(I) \quad \frac{R_p}{R_{STD}} = \frac{I_p / N_p}{I_{STD} / N_{STD}} = X_1$$

$$(II) \quad \text{mol}_p = \text{mol}_{STD} \times X_1 = Y_2$$

$$(III) \quad \% \text{yield} = \frac{Y_2}{\text{mol}_{\text{alkene}}} \times 100$$

When  $I_p$  = Integration from the proton signal of the analysed product (e.g.,  $H_a$ ,  $H_b$ , or  $H_c$ )  
 $N_p$  = Number of protons in the structure of product. For example,  $N_p$  of  $H_a$ ,  $H_b$ , or  $H_c$  = 1  
 $I_{STD}$  = The integration of proton signal of the internal standard (e.g.,  $-\text{CH}_3$ )  
 $N_{STD}$  = Number of protons in the structure of internal standard.

For example,  $N_p$  of  $-\text{CH}_3$  = 3

$\text{mol}_{STD} = 0.11 \text{ mmol}$

$\text{mol}_{\text{alkene}} = 0.37 \text{ mmol}$

For Example: Considering the spectrum from Figure S5,

$$(I) \quad \frac{R_p}{R_{STD}} = \frac{0.82/1}{1.00/3} = 2.48$$

$$(II) \quad \text{mol}_p = 0.11 \times 2.48 = 0.27$$

$$(III) \quad \% \text{yield} = \frac{0.27}{0.37} \times 100 = 73 \%$$

**Table S1** Effect of surfactant concentration on copper-catalysed ATRA in water.

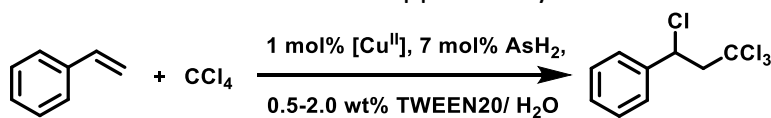

| Entry | Surfactant concentration in H <sub>2</sub> O (%w/w) | Conversion (%) |
|-------|-----------------------------------------------------|----------------|
| 1     | 0.5 wt% Tween 20                                    | 39             |
| 2     | 1.0 wt% Tween 20                                    | 50             |
| 3     | 2.0 wt% Tween 20                                    | 99             |

All Reactions were performed at 60°C for 6 h using **1b** as an ATRA catalyst with the molar ratio of [alkene]: [CCl<sub>4</sub>]: [AsH<sub>2</sub>] = 1.00: 1.25: 0.07 and [Styrene]<sub>0</sub> = 0.147 M.

% conversions were determined by <sup>1</sup>H NMR spectroscopy.

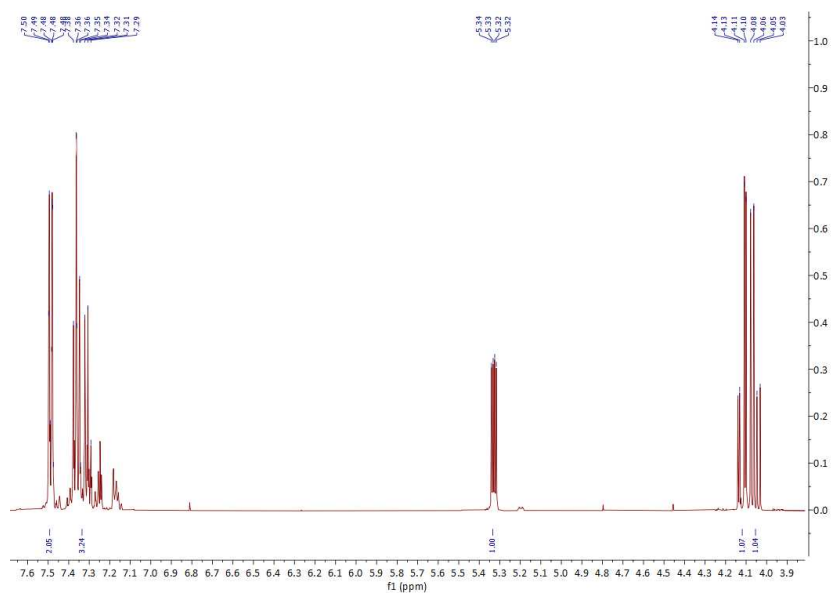

**Figure S6**  $^1\text{H}$  NMR spectrum of **1b**-catalysed ATRA of  $\text{CBr}_4$  to styrene

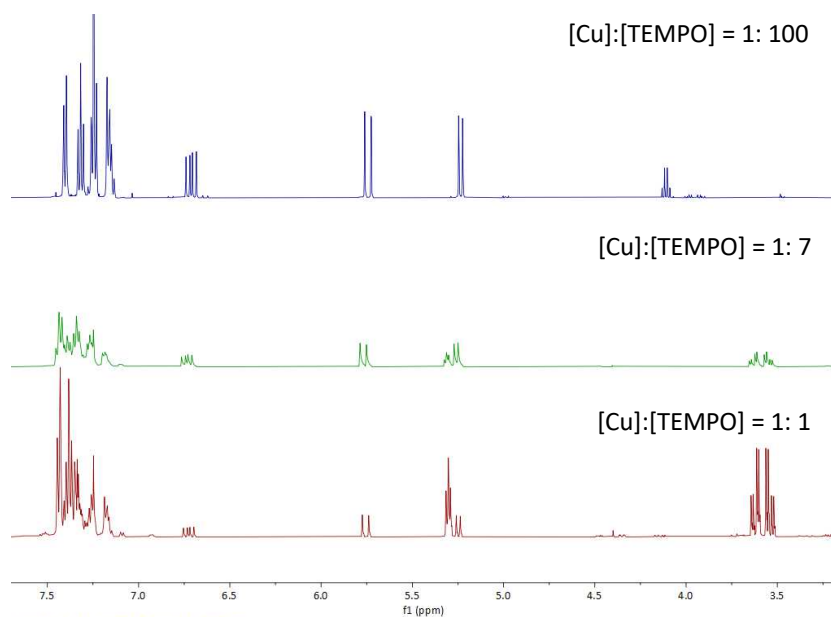

**Figure S7**  $^1\text{H}$  NMR spectra of **1b**-catalysed ATRA of  $\text{CCl}_4$  to styrene in the presence of TEMPO in 2 wt% Tween 20/ $\text{H}_2\text{O}$ .

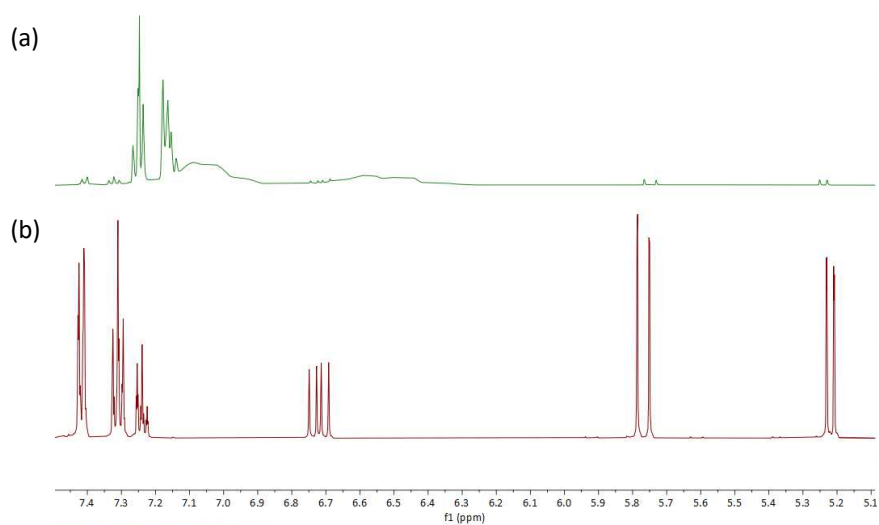

**Figure S8**  $^1\text{H}$  NMR spectra of **1b**-catalysed ATRA of  $\text{CCl}_4$  to styrene using AIBN as a reducing agent with  $[\text{alkene}]: [\text{CCl}_4]: [\text{AIBN}] = 1.00: 1.25: 0.07$  in (a) 2 wt% Tween 20/ $\text{H}_2\text{O}$  at  $60\text{ }^\circ\text{C}$  for 6 h which gave 99% conversion but the product was not the monoadduct; and (b) 2.5%  $\text{D}_2\text{O}/\text{CD}_3\text{CN}$  at room temperature ( $30\text{-}35\text{ }^\circ\text{C}$ ) for 24 h which gave no conversion.

## Comparison of catalytic performance of various copper catalysts for ATRA

**Table S2** Previously-reported copper-catalysed ATRA.

| Entry                                                        | Catalyst                                                                         | Alkene/Initiator/Reducing agent<br>([Alkene]: [Reducing agent]) | Condition                                                           | Conversion (%) | Yield (%) | Ref.      |
|--------------------------------------------------------------|----------------------------------------------------------------------------------|-----------------------------------------------------------------|---------------------------------------------------------------------|----------------|-----------|-----------|
| 1                                                            | [Cu <sup>II</sup> (1Q)Cl]<br>(1Q= N,N-bis(pyridine-2-ylmethyl)quinoline-8-amine) | Styrene/CCl <sub>4</sub> /AIBN                                  | 1.0% Cat. in CD <sub>3</sub> CN, N <sub>2</sub> , white LEDs, 24 h. |                | 98        | <b>S3</b> |
|                                                              |                                                                                  | Styrene/CHCl <sub>3</sub> /AIBN                                 |                                                                     |                | 53        |           |
|                                                              |                                                                                  | Styrene/CBr <sub>4</sub> /AIBN                                  |                                                                     |                | 90        |           |
|                                                              |                                                                                  | Styrene/CHBr <sub>3</sub> /AIBN                                 |                                                                     |                | 73        |           |
|                                                              |                                                                                  | Styrene/CHCl <sub>3</sub> /L-ascorbic acid (1.0: 0.05)          |                                                                     | 61             | 60        |           |
|                                                              |                                                                                  | Styrene/CCl <sub>4</sub> /AIBN                                  |                                                                     |                | 100       |           |
|                                                              |                                                                                  | Acrylonitrile/CCl <sub>4</sub> /AIBN                            | 1.0% Cat. in CD <sub>3</sub> OD, N <sub>2</sub> , white CFL, 48 h.  |                | 88        |           |
| Methyl methacrylate (MMA)/CCl <sub>4</sub> /AIBN (1.0: 0.05) |                                                                                  |                                                                 | 95                                                                  |                |           |           |
| 2                                                            | [Cu <sup>II</sup> (TPMA)Cl][Cl]                                                  | Styrene/CCl <sub>4</sub> /AIBN                                  | 0.4% Cat. 60°C                                                      |                | 85        | <b>S4</b> |
|                                                              |                                                                                  | 1-hexene/CCl <sub>4</sub> /AIBN                                 | 0.01% Cat. 60°C                                                     |                | 72        |           |
|                                                              |                                                                                  | Methyl methacrylate (MMA)/CCl <sub>4</sub> /V-70                | 0.1% Cat. ambient temp.                                             |                | 66        |           |
| 3                                                            | [Cu <sup>II</sup> (TPMA)Br]Br                                                    | Styrene/CBr <sub>4</sub> /AIBN                                  | 0.0005% Cat. in bulk, 60°C, 24 h.                                   |                | 95        |           |
|                                                              |                                                                                  | 1-hexene/CBr <sub>4</sub> /V-70                                 |                                                                     |                | 93        |           |
|                                                              |                                                                                  | Methyl methacrylate (MMA)/CBr <sub>4</sub> /V-70                | 0.0005% Cat. in bulk, 60°C, 24 h.                                   |                | 71        |           |
|                                                              |                                                                                  |                                                                 | 0.01% Cat. ambient temp.                                            |                |           |           |
| 4                                                            | [Cu <sup>II</sup> (Me <sub>6</sub> TREN)Cl][Cl] 0.4%                             | 1-hexene/CCl <sub>4</sub> /AIBN                                 | 0.1% Cat. in CH <sub>3</sub> CN, 60 °C, 24 h.                       | 100            | 100       | <b>S5</b> |
|                                                              |                                                                                  | Methyl Acrylate (MA)/CCl <sub>4</sub> /AIBN                     | 0.4% Cat. in CH <sub>3</sub> CN, 60 °C, 24 h.                       | 100            | 67        |           |
|                                                              |                                                                                  | Styrene/CHCl <sub>3</sub> /AIBN (1: 0.05)                       |                                                                     | 77             | 40        |           |
| 5                                                            | [Cu <sup>II</sup> (Me <sub>6</sub> TREN)Br][Br]                                  | Methyl Acrylate (MA)/CBr <sub>4</sub> /AIBN (1: 0.05)           | 0.1% Cat.in CH <sub>3</sub> CN at 60 °C, 24 h.                      | 100            | 87        |           |

**Table S2** Previously-reported copper-catalysed ATRA (continued).

| Entry                                             | Catalyst                                                      | Alkene/Initiator/Reducing agent<br>([Alkene]: [Reducing agent])              | Condition                                      | Conversion (%) | Yield (%) | Ref.             |
|---------------------------------------------------|---------------------------------------------------------------|------------------------------------------------------------------------------|------------------------------------------------|----------------|-----------|------------------|
| 6                                                 | [Cu <sup>II</sup> (TPEN)Br][Br]                               | Styrene/CBr <sub>4</sub> /L-ascorbic acid                                    | 0. 1% Cat. in                                  | 97             | 61        | <b>S6</b>        |
|                                                   |                                                               | Methyl methacrylate (MMA)<br>/CBr <sub>4</sub> /L-ascorbic acid<br>(1: 0.07) | MeOH, 60 °C,<br>24 h.                          | 90             | 29        |                  |
| 7                                                 | CuCl or CuCl <sub>2</sub>                                     | Styrene/TsCl/No additive                                                     | 1% Cat. in                                     |                | NR        | <b>S7</b>        |
| 8                                                 | CuCl/phen or<br>CuCl <sub>2</sub> /phen                       |                                                                              | CH <sub>3</sub> CN, visible<br>light (530 nm), |                | NR        |                  |
| 9                                                 | [Cu(dap) <sub>2</sub> ]Cl                                     |                                                                              | N <sub>2</sub> , r. t. (25-30                  |                | 96        |                  |
| 10                                                | [Cu(dap)Cl <sub>2</sub> ]                                     |                                                                              | °C), 24 h.                                     |                | 95        |                  |
| 11                                                | [Ru(bpy) <sub>3</sub> ]Cl <sub>2</sub>                        |                                                                              |                                                |                | 80        |                  |
| 12                                                | [Cu(ADPA)(H <sub>2</sub> O)(ClO <sub>4</sub> ) <sub>2</sub> ] | Styrene                                                                      | 1% Cat. in 2wt%                                | >99            | 100       | <b>This work</b> |
|                                                   |                                                               | Methyl methacrylate (MMA)                                                    | Tween 20/H <sub>2</sub> O,                     | 85             | 52        |                  |
|                                                   |                                                               | Acrylonitrile                                                                | 60 °C, 24 h.                                   | 28             | 30        |                  |
|                                                   |                                                               | 1-hexene                                                                     |                                                | 92             | 88        |                  |
|                                                   |                                                               | /CCl <sub>4</sub> /L-ascorbic acid<br>(1.00:0.07)                            |                                                |                |           |                  |
|                                                   |                                                               | Styrene                                                                      | 1% Cat. in 2wt%                                | 87             | 77        |                  |
|                                                   |                                                               | Methyl methacrylate (MMA)                                                    | Tween 80/H <sub>2</sub> O,                     | 93             | 48        |                  |
|                                                   |                                                               | Acrylonitrile                                                                | 60 °C, 24 h.                                   | 74             | 67        |                  |
| 1-hexene                                          |                                                               | >99                                                                          | 95                                             |                |           |                  |
| /CCl <sub>4</sub> /L-ascorbic acid<br>(1.00:0.07) |                                                               |                                                                              |                                                |                |           |                  |

\*NR = no reaction

## Determination of droplet/ particle size

The sample was prepared according to experiment 2.2.3 in the same condition as shown in Table 2, Entry 7 by using **1b** as the catalyst for ATRA of  $\text{CCl}_4$  to styrene in 2 wt% Tween 20/  $\text{H}_2\text{O}$  at  $60^\circ\text{C}$  for 6 h. The colloidal solution (designated as 1b\_2%TWEEN20) was then diluted by an addition of Milli-Q water to obtain the final concentration of 1mM Tween 20 (designated as 1b\_1mMTWEEN20). After that, the particle diameter of these samples was measured by dynamic light scattering (DLS).

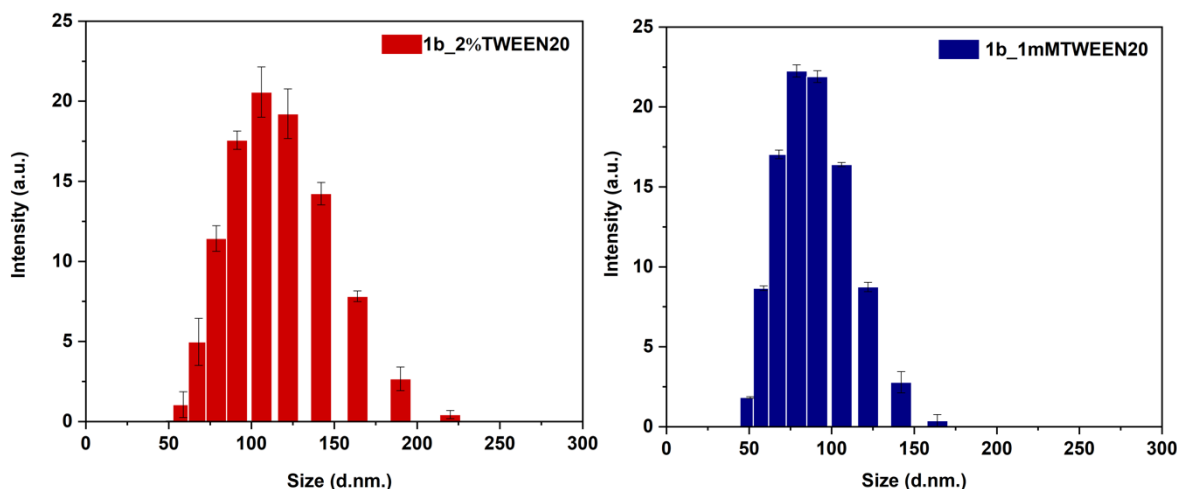

**Figure S9** Droplet/particle size distribution of the samples with 2%Tween 20 (■) and 1mM Tween 20 (■) measured by dynamic light scattering (DLS).

**Table S3** Z-average particle diameter (d) analyzed by DLS

| Entry | Sample        | T ( $^\circ\text{C}$ ) | Z-Ave (d, nm) | $\sigma_d$ (nm) |
|-------|---------------|------------------------|---------------|-----------------|
| 1     | 1b_2%TWEEN20  | 25                     | 106.32        | 1.68            |
| 2     | 1b_1mMTWEEN20 | 25                     | 84.41         | 1.31            |
| 3*    | 1b_1mMTWEEN20 | 25                     | 121.1         | 1.27            |

$\sigma_d$  is standard deviation and polydispersity index (Pdl) is less than 0.03.

\*Micelle diameter (d) of 1mM TWEEN20 (20 CMC) is 7.2 nm ( $\sigma_d = 1.2$  nm).<sup>S8</sup>

\*A sample in Entry 2 was kept for 74 days before measuring Z-average particle diameter again.



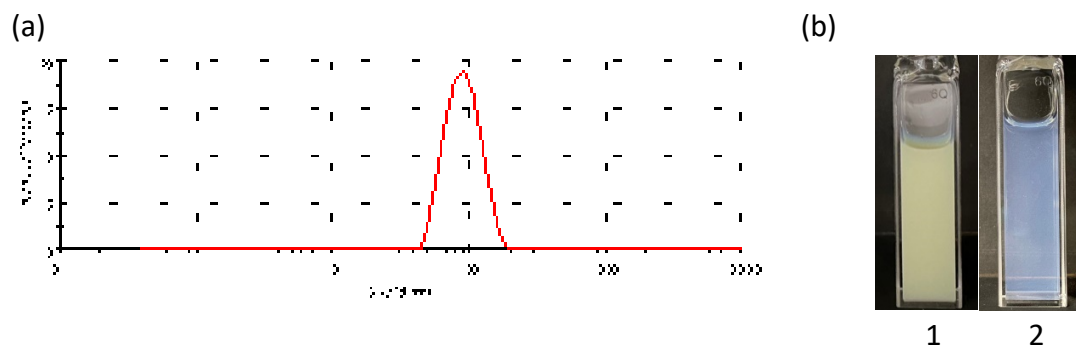

**Figure S10** (a) Representative DLS analysis of **1b**-catalysed ATRA dispersed in 2 wt% TWEEN20/H<sub>2</sub>O; and (b) photograph of the ATRA reaction in 2 wt% TWEEN20/H<sub>2</sub>O (1) versus diluted to 1mM TWEEN20 (2).

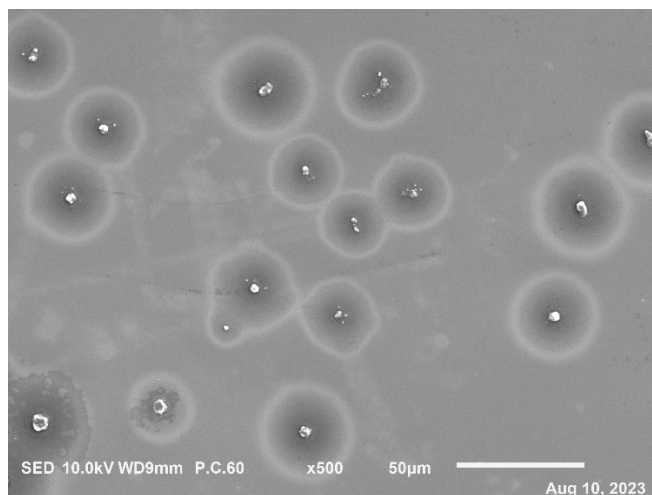

**Figure S11** SEM image of **1b**-catalysed ATRA reaction 2 wt% TWEEN20/H<sub>2</sub>O which was diluted to 0.5 mM TWEEN20.

## References

- S1** J. J. Salisbury, *Analytical Chemistry*, 2011, **83**, 8766-8771.
- S2** G. F. Pauli, *Journal of medicinal chemistry*, 2014, **57**, 9220-9231.
- S3** O. Reiser and M. Sukwattanasinitt, *New J. Chem.*, 2022, **46**, 12158.
- S4** T. Pintauer, *Eur. J. Inorg. Chem.* 2010, 2449-2460.
- S5** W. T. Eckenhoff and T. Pintauer, *Dalton Trans.*, 2011, **40**, 4909.
- S6** T. Pintauer, *Polymer*, 2015, **72**, 246-252.
- S7** O. Reiser, *ACS Catal.* 2019, **9**, 1103-1109.
- S8** P. A. Kralchevsky, *Phys. Chem. Chem. Phys.*, 2007, **9**, 5183-5198.
